# Supplementary material
Source: ML conference proceedings conference paper supplement (https://openaccess.thecvf.com/content/WACV2024/html/Huix_Are_Natural_Domain_WACV_2024_paper.html)
Supplement: Supplementary file 1 [file Huix_Are_Natural_Domain_WACV_2024_supplemental.pdf]

# Supplementary Material for Are Natural Domain Foundation Models Useful for Medical Image Classification?

## A. Additional CKA analysis

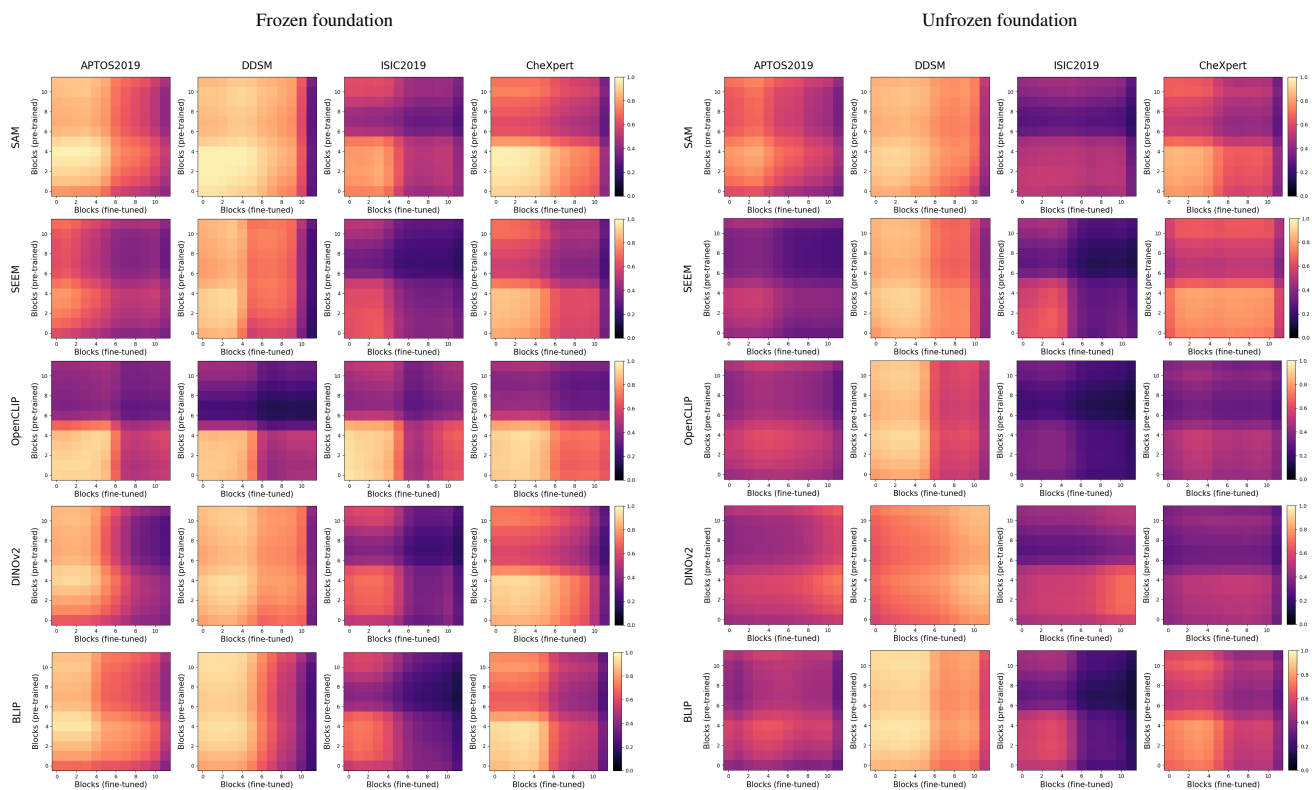

Figure A.1. Layerwise CKA similarities between the pre-trained and fine-tuned DEiT classifier appended on top of different foundation models. The heat maps are generated for two scenarios, frozen and unfrozen foundation.

## B. In-domain pretraining

We investigate the impact of in-domain self-supervised pretraining. Specifically, we employ DINOv1 [3] and pretrain RESNET152 models on the downstream datasets. We follow the training recipe described in [24], followed by supervised fine-tuning as in Section 3. We report the results in Table B.1 and Table B.2. For comparison, we also present the results of the RESNET152 baseline, pretrained on IMAGENET-1k, and DINOv2, the top-performer in this work. When the foundation models are kept frozen, in-domain self-supervision significantly outperforms the other two pretraining strategies. This is a rather expected result, given that the model has adapted its features on the downstream datasets. Surprisingly, we find that when the full model is fine-tuned – as typically followed in practice – DINOv2 outperforms even its self-supervised RESNET152 counterpart.

Table B.1. Frozen foundation models.

| <b>Foundation</b><br>(Frozen)          | <b>APTOS2019</b> , $\kappa \uparrow$<br>$n = 3,662$ | <b>DDSM</b> , AUC $\uparrow$<br>$n = 10,239$ | <b>ISIC2019</b> , Rec. $\uparrow$<br>$n = 25,333$ | <b>CheXpert</b> , AUC $\uparrow$<br>$n = 224,316$ |
|----------------------------------------|-----------------------------------------------------|----------------------------------------------|---------------------------------------------------|---------------------------------------------------|
| RESNET152– pretrained on IMAGENET-1k   | $0.824 \pm 0.003$                                   | $0.883 \pm 0.001$                            | $0.461 \pm 0.027$                                 | $0.712 \pm 0.000$                                 |
| RESNET152– self-supervised with DINOv1 | $0.855 \pm 0.004$                                   | $0.920 \pm 0.001$                            | $0.610 \pm 0.020$                                 | $0.708 \pm 0.000$                                 |
| DINOv2                                 | $0.881 \pm 0.002$                                   | $0.905 \pm 0.001$                            | $0.569 \pm 0.012$                                 | $0.722 \pm 0.000$                                 |

Table B.2. Unfrozen foundation models.

| <b>Foundation</b><br>(Unfrozen)        | <b>APTOS2019</b> , $\kappa \uparrow$<br>$n = 3,662$ | <b>DDSM</b> , AUC $\uparrow$<br>$n = 10,239$ | <b>ISIC2019</b> , Rec. $\uparrow$<br>$n = 25,333$ | <b>CheXpert</b> , AUC $\uparrow$<br>$n = 224,316$ |
|----------------------------------------|-----------------------------------------------------|----------------------------------------------|---------------------------------------------------|---------------------------------------------------|
| RESNET152– pretrained on IMAGENET-1k   | $0.899 \pm 0.002$                                   | $0.960 \pm 0.003$                            | $0.817 \pm 0.007$                                 | $0.807 \pm 0.000$                                 |
| RESNET152– self-supervised with DINOv1 | $0.898 \pm 0.006$                                   | $0.954 \pm 0.004$                            | $0.818 \pm 0.002$                                 | $0.810 \pm 0.000$                                 |
| DINOv2                                 | $0.909 \pm 0.009$                                   | $0.966 \pm 0.003$                            | $0.859 \pm 0.007$                                 | $0.812 \pm 0.001$                                 |
